# Supplementary material
Source: Springer Nature journal article supplement (https://www.springermedizin.de/resource/supplementary/13063_2012_1098_MOESM4_ESM.pdf/9619700)

# SASA! Logic Model

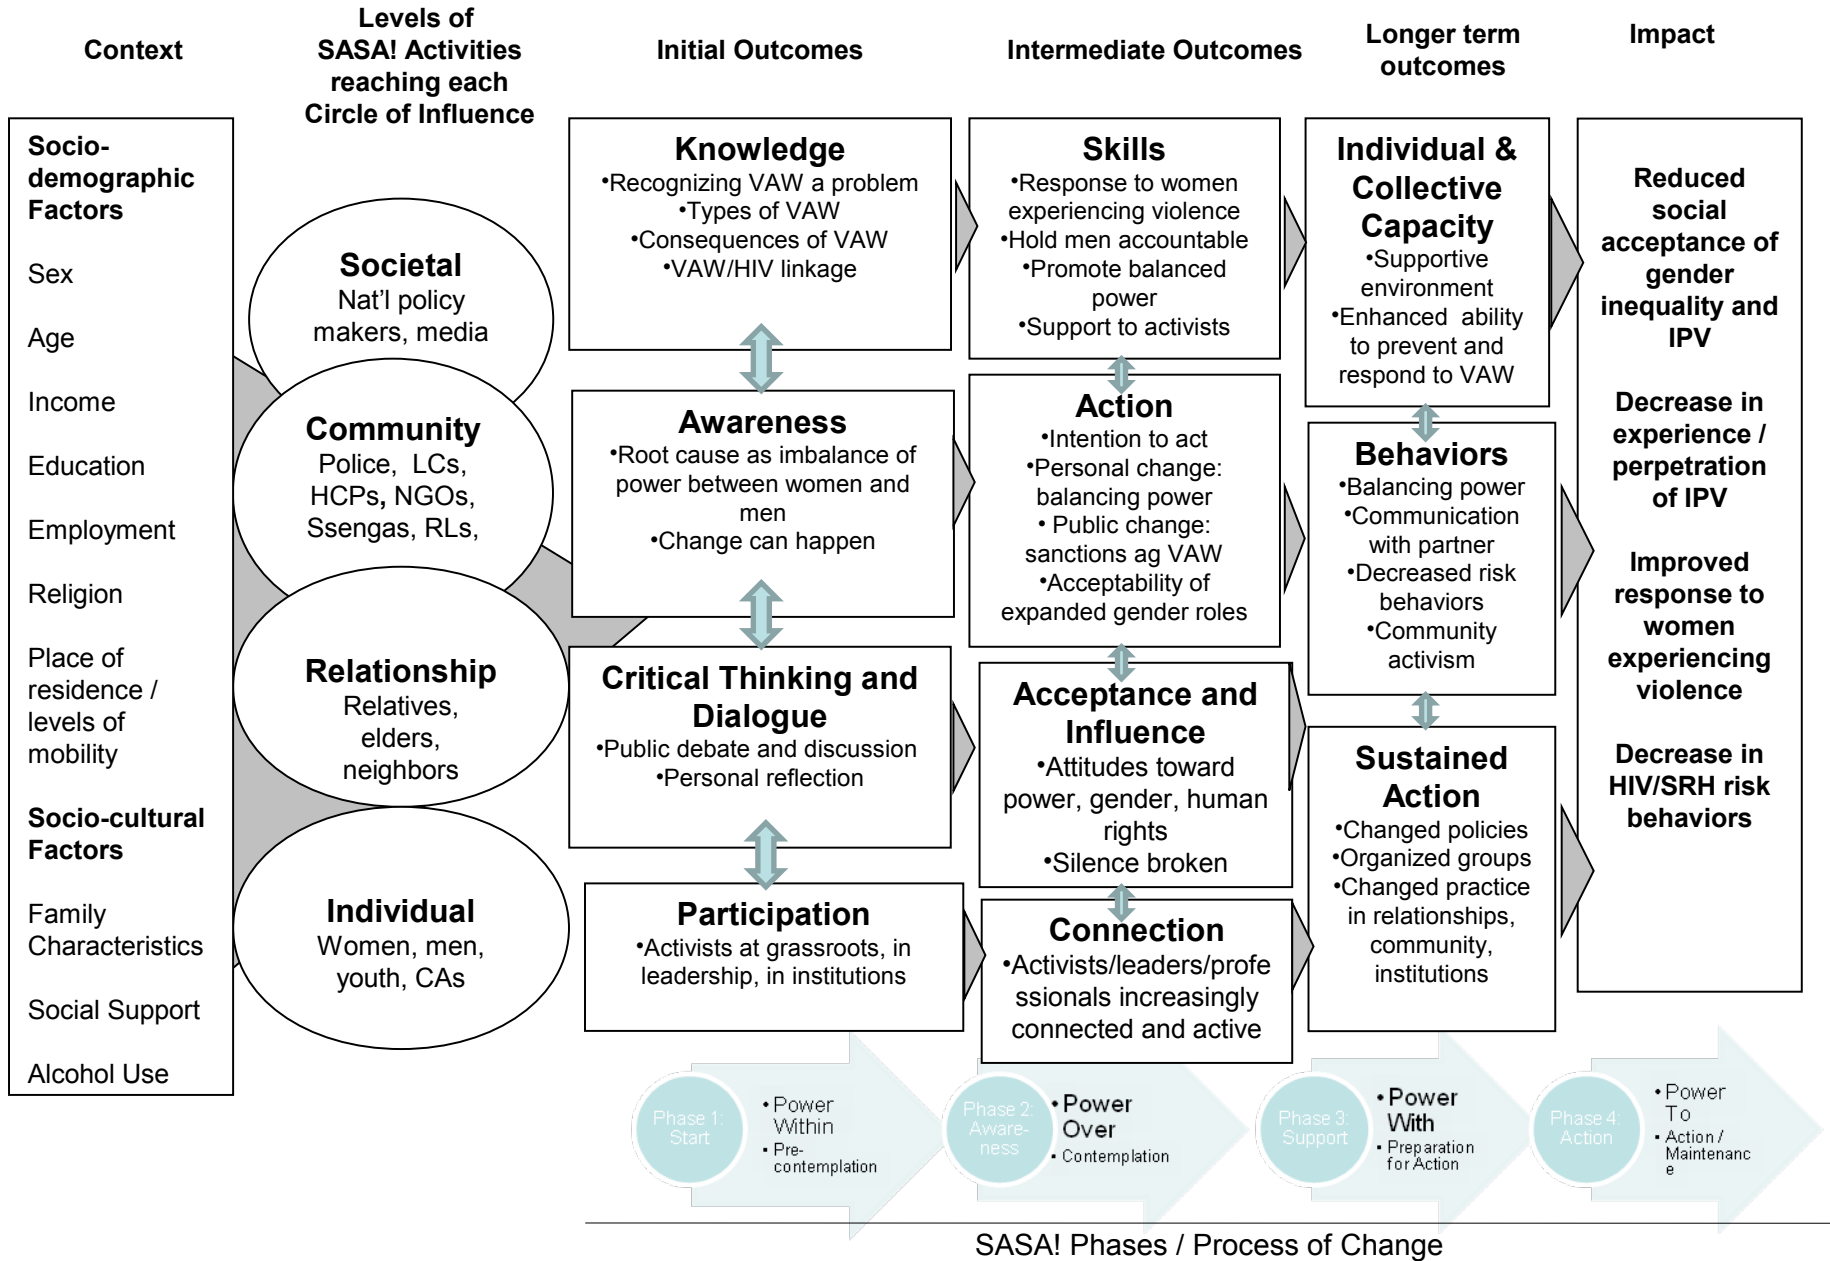

Supplement: MOESM4 [file 9619700]
